# Supplementary material
Source: publisher figshare collection journal article supplement (https://gsapubs.figshare.com/articles/dataset/_/12542087)
Supplement: Supplementary file 1 [file 1]

Table DR1. Values of individual bank migrations and changes in bar-to-bank widths along each individual river bend over each time interval

| bend number | distance downstream to apex [km] | 2011 bar-to-bank width [m] | 2011-2015 inner bank migration [m] | 2011-2015 outer bank migration [m] | 2015 bar-to-bank width [m] | 2015-2017 inner bank migration [m] | 2015-2017 outer bank migration [m] | 2017 bar-to-bank width [m] | 2011-2015 bar-to-bank fractional width change | 2015-2017 bar-to-bank fractional width change | 2011-2017 bar-to-bank fractional width change |
|-------------|----------------------------------|----------------------------|------------------------------------|------------------------------------|----------------------------|------------------------------------|------------------------------------|----------------------------|-----------------------------------------------|-----------------------------------------------|-----------------------------------------------|
| 1           | 0.0                              | 99                         | 10.2                               | 12.5                               | 97                         | 1.6                                | 8.3                                | 104                        | 0.98                                          | 1.07                                          | 1.05                                          |
| 2           | 0.5                              | 92                         | 14.0                               | 13.3                               | 89                         | 7.2                                | 6.9                                | 87                         | 0.97                                          | 0.98                                          | 0.95                                          |
| 3           | 1.8                              | 100                        | 16.9                               | 13.0                               | 92                         | 6.1                                | 10.7                               | 97                         | 0.92                                          | 1.05                                          | 0.97                                          |
| 4           | 3.2                              | 89                         | 18.0                               | 11.9                               | 80                         | 12.0                               | 13.8                               | 81                         | 0.90                                          | 1.02                                          | 0.91                                          |
| 5           | 6.9                              | 101                        | 9.2                                | 12.9                               | 102                        | -0.2                               | 8.0                                | 110                        | 1.01                                          | 1.08                                          | 1.09                                          |
| 6           | 9.7                              | 106                        | 14.3                               | 9.9                                | 97                         | -0.9                               | 1.6                                | 100                        | 0.91                                          | 1.04                                          | 0.95                                          |
| 7           | 10.6                             | 99                         | 19.1                               | 16.7                               | 92                         | 17.0                               | 13.1                               | 88                         | 0.93                                          | 0.96                                          | 0.89                                          |
| 8           | 11.1                             | 104                        | 13.5                               | 12.4                               | 93                         | 5.0                                | 6.8                                | 95                         | 0.89                                          | 1.03                                          | 0.92                                          |
| 9           | 11.9                             | 121                        | 31.5                               | 15.2                               | 89                         | -2.7                               | 6.6                                | 99                         | 0.74                                          | 1.11                                          | 0.82                                          |
| 10          | 12.8                             | 102                        | 11.8                               | 13.5                               | 94                         | 7.3                                | 2.6                                | 90                         | 0.91                                          | 0.96                                          | 0.88                                          |
| 11          | 14.1                             | 92                         | 12.2                               | 8.2                                | 80                         | 2.8                                | 7.0                                | 86                         | 0.87                                          | 1.07                                          | 0.93                                          |
| 12          | 15.9                             | 98                         | 1.8                                | 6.5                                | 97                         | 2.3                                | 0.8                                | 96                         | 0.99                                          | 1.00                                          | 0.99                                          |
| 13          | 16.9                             | 91                         | 8.9                                | 8.3                                | 86                         | 12.3                               | 3.4                                | 86                         | 0.94                                          | 1.00                                          | 0.94                                          |
| 14          | 17.5                             | 90                         | 4.9                                | 7.4                                | 88                         | 8.8                                | 3.1                                | 82                         | 0.98                                          | 0.94                                          | 0.92                                          |
| 15          | 18.1                             | 93                         | 11.9                               | 9.5                                | 89                         | 3.8                                | 3.3                                | 89                         | 0.95                                          | 1.00                                          | 0.96                                          |
| 16          | 18.6                             | 102                        | 1.0                                | 4.9                                | 105                        | 3.2                                | 2.3                                | 101                        | 1.03                                          | 0.96                                          | 0.99                                          |
| 17          | 20.0                             | 107                        | 7.0                                | 5.7                                | 99                         | 1.2                                | 3.3                                | 102                        | 0.93                                          | 1.03                                          | 0.95                                          |
| 18          | 20.6                             | 106                        | -2.5                               | 3.3                                | 111                        | 3.6                                | 1.1                                | 108                        | 1.04                                          | 0.98                                          | 1.02                                          |
| 19          | 22.2                             | 98                         | 2.4                                | 4.0                                | 96                         | 1.8                                | 3.3                                | 98                         | 0.98                                          | 1.01                                          | 0.99                                          |
| 20          | 23.0                             | 83                         | 2.7                                | 3.2                                | 82                         | 1.7                                | 4.4                                | 86                         | 0.99                                          | 1.04                                          | 1.03                                          |
| 21          | 24.9                             | 93                         | 5.3                                | 6.8                                | 91                         | 2.7                                | 1.4                                | 91                         | 0.99                                          | 1.00                                          | 0.99                                          |
| 22          | 25.6                             | 87                         | 2.9                                | 5.5                                | 87                         | 2.1                                | 4.1                                | 90                         | 1.00                                          | 1.03                                          | 1.03                                          |
| 23          | 26.2                             | 87                         | 2.5                                | 3.9                                | 84                         | 4.0                                | 2.8                                | 84                         | 0.96                                          | 1.00                                          | 0.96                                          |
| 24          | 26.9                             | 95                         | 5.3                                | 8.1                                | 93                         | -0.2                               | 5.1                                | 98                         | 0.98                                          | 1.05                                          | 1.03                                          |
| 25          | 27.5                             | 96                         | 7.2                                | 5.3                                | 91                         | -4.5                               | 4.5                                | 101                        | 0.95                                          | 1.11                                          | 1.06                                          |
| 26          | 28.1                             | 88                         | 4.1                                | 7.4                                | 88                         | 3.6                                | 4.4                                | 87                         | 1.01                                          | 0.98                                          | 0.99                                          |
| 27          | 28.8                             | 124                        | 1.7                                | 4.9                                | 128                        | 9.8                                | 3.5                                | 119                        | 1.03                                          | 0.93                                          | 0.96                                          |
| 28          | 29.5                             | 90                         | 10.2                               | 8.5                                | 90                         | 5.2                                | 3.6                                | 89                         | 1.00                                          | 0.99                                          | 0.99                                          |
| 29          | 29.9                             | 86                         | 9.8                                | 11.7                               | 88                         | 10.4                               | 4.8                                | 81                         | 1.02                                          | 0.93                                          | 0.95                                          |
| 30          | 30.6                             | 88                         | 2.1                                | 4.1                                | 89                         | 1.3                                | 2.0                                | 89                         | 1.01                                          | 1.00                                          | 1.01                                          |

Videos DR1 and DR2 (detailed changes in elevation along a single river bend through time, and changes in bar-to-bank width through time along a continuous reach of several river bends)
